# Supplementary material
Source: PubMed Central journal article supplement (PMC3141341)
Supplement: NIHMS307592-supplement-1.pdf [file NIHMS307592-supplement-1.pdf]

## Supporting Information

Table S1. Summary of the MD simulations of alkali halide water mixtures: All simulations were performed at 300 K and 1atm in the  $NpT$  ensemble. Symbols are  $N_w$ , number of water molecules;  $N_s$  ( $= N_+ = N_- = 1/2N_c$ ), number of alkali-halide pairs;  $V$ , average simulation volume;  $m_s$ , salt molality;  $C_s$ , salt molarity;  $\rho$ , mass density;  $E_{pot}$ , average total potential energy per molecule ( $N_s + N_w$ ); and  $T_{sim}$ , total simulation time.

|      | $N_s$ | $N_w$ | $m_s$<br>(mol/Kg) | $V$<br>(nm <sup>3</sup> ) | $C_s$<br>(mol/l) | $\rho$<br>(g/cm <sup>3</sup> ) | $E_{pot}$<br>(kJ/mol) | $T_{sim}$<br>(ns) |
|------|-------|-------|-------------------|---------------------------|------------------|--------------------------------|-----------------------|-------------------|
| H2O  | 0     | 2170  | 0.00              | 65.265                    | 0.00             | 0.995                          | -46.45                | 2                 |
| NaF  | 20    | 2150  | 0.52              | 64.531                    | 0.52             | 1.018                          | -54.94                | 6                 |
|      | 38    | 2079  | 1.01              | 64.519                    | 1.03             | 1.040                          | -63.05                | 6                 |
| NaCl | 38    | 2079  | 1.01              | 63.595                    | 0.99             | 1.036                          | -60.07                | 6                 |
|      | 77    | 2048  | 2.09              | 63.829                    | 2.00             | 1.077                          | -73.99                | 4                 |
|      | 115   | 1987  | 3.21              | 63.354                    | 3.01             | 1.114                          | -88.00                | 4                 |
|      | 154   | 1950  | 4.38              | 63.783                    | 4.01             | 1.149                          | -102.02               | 4                 |
|      | 38    | 2079  | 1.01              | 64.089                    | 0.98             | 1.072                          | -59.62                | 5                 |
| NaBr | 77    | 2048  | 2.09              | 64.810                    | 1.97             | 1.148                          | -73.05                | 5                 |
|      | 115   | 1987  | 3.21              | 64.730                    | 2.95             | 1.222                          | -86.59                | 9                 |
|      | 154   | 1950  | 4.38              | 65.584                    | 3.90             | 1.291                          | -100.08               | 5                 |
|      | 231   | 1730  | 7.41              | 63.426                    | 6.05             | 1.438                          | -132.53               | 9                 |
|      | 308   | 1600  | 10.69             | 64.350                    | 7.95             | 1.562                          | -163.90               | 9                 |
| NaI  | 38    | 2079  | 1.01              | 65.051                    | 0.97             | 1.101                          | -58.86                | 5                 |
|      | 77    | 2048  | 2.09              | 66.683                    | 1.92             | 1.206                          | -71.52                | 5                 |
|      | 115   | 1987  | 3.21              | 67.458                    | 2.83             | 1.305                          | -84.27                | 5                 |
|      | 154   | 1950  | 4.38              | 69.151                    | 3.70             | 1.398                          | -96.97                | 5                 |
|      | 231   | 1730  | 7.41              | 68.599                    | 5.59             | 1.593                          | -127.35               | 5                 |
|      | 308   | 1600  | 10.69             | 71.253                    | 7.18             | 1.748                          | -156.79               | 5                 |
| LiCl | 127   | 7065  | 1.00              | 216.903                   | 0.97             | 1.016                          | -62.37                | 6                 |
|      | 367   | 6796  | 3.00              | 217.842                   | 2.80             | 1.052                          | -92.29                | 6                 |
|      | 589   | 6541  | 5.00              | 219.083                   | 4.47             | 1.082                          | -120.13               | 6                 |
| KCl  | 126   | 7002  | 1.00              | 216.178                   | 0.97             | 1.041                          | -58.36                | 6                 |
|      | 357   | 6603  | 3.00              | 215.924                   | 2.75             | 1.120                          | -80.74                | 6                 |
|      | 561   | 6228  | 5.00              | 216.204                   | 4.31             | 1.183                          | -101.56               | 6                 |
| RbCl | 125   | 6963  | 1.00              | 216.055                   | 0.96             | 1.080                          | -57.79                | 6                 |
|      | 352   | 6512  | 3.00              | 215.995                   | 2.71             | 1.229                          | -79.14                | 6                 |
|      | 549   | 6093  | 5.00              | 216.324                   | 4.22             | 1.352                          | -99.03                | 6                 |
| CsCl | 125   | 6915  | 1.00              | 216.032                   | 0.96             | 1.119                          | -57.38                | 6                 |
|      | 345   | 6385  | 3.00              | 215.737                   | 2.66             | 1.333                          | -77.74                | 6                 |
|      | 533   | 5920  | 5.00              | 216.025                   | 4.10             | 1.510                          | -96.76                | 6                 |
| KI   | 124   | 6880  | 1.00              | 217.183                   | 0.95             | 1.105                          | -57.18                | 6                 |
|      | 340   | 6300  | 3.00              | 218.381                   | 2.59             | 1.292                          | -77.20                | 6                 |
|      | 522   | 5796  | 5.00              | 219.331                   | 3.95             | 1.447                          | -95.97                | 6                 |
| CsBr | 124   | 6870  | 1.00              | 216.248                   | 0.95             | 1.153                          | -56.93                | 6                 |
|      | 339   | 6275  | 3.00              | 216.377                   | 2.60             | 1.422                          | -76.47                | 6                 |
|      | 519   | 5761  | 5.00              | 216.598                   | 3.98             | 1.640                          | -94.77                | 6                 |

Table S2. First shell coordination numbers ( $n_{ij}^{1st}$ ) and second shell coordination numbers ( $n_{ij}^{2nd}$ ) as a function of concentration (m) alkali halide aqueous solutions.  $R_{max}^{1st}/R_{min}^{1st}$  and  $R_{max}^{2nd}/R_{min}^{2nd}$  are the distances (nm) to the first and the second maximum/minimum of the radial distribution functions. Cations, anions, and the water oxygen are denoted by the symbols +, -, and o, respectively.

|                | m               | +/-             | +/o   | -/o   | o/o   |       |       |
|----------------|-----------------|-----------------|-------|-------|-------|-------|-------|
| NaF            | $R_{max}^{1st}$ |                 | 0.25  | 0.23  | 0.30  | 0.27  |       |
|                | $R_{min}^{1st}$ |                 | 0.326 | 0.310 | 0.364 | 0.342 |       |
|                | $n_{ij}^{1st}$  | 0.5             | 0.06  | 5.54  | 7.01  | 4.80  |       |
|                |                 | 1.0             | 0.03  | 5.48  | 7.04  | 4.75  |       |
|                | $R_{max}^{2nd}$ |                 | 0.48  | 0.44  | 0.48  | 0.45  |       |
|                | $R_{min}^{2nd}$ |                 | 0.562 | 0.540 | 0.592 | 0.564 |       |
|                | $n_{ij}^{2nd}$  | 0.5             | 0.39  | 17.51 | 21.90 | 19.29 |       |
|                |                 | 1.0             | 0.80  | 17.38 | 21.85 | 19.25 |       |
|                | NaCl            | $R_{max}^{1st}$ |       | 0.27  | 0.23  | 0.32  | 0.28  |
|                |                 | $R_{min}^{1st}$ |       | 0.355 | 0.315 | 0.405 | 0.345 |
| $n_{ij}^{1st}$ |                 | 0.99            | 0.09  | 5.52  | 8.11  | 5.12  |       |
|                |                 | 2.00            | 0.20  | 5.39  | 8.22  | 5.11  |       |
|                |                 | 3.01            | 0.42  | 5.11  | 8.38  | 5.06  |       |
|                |                 | 4.01            | 0.57  | 4.93  | 8.45  | 5.00  |       |
| NaBr           |                 | $R_{max}^{1st}$ |       | 0.28  | 0.23  | 0.33  | 0.28  |
|                |                 | $R_{min}^{1st}$ |       | 0.365 | 0.315 | 0.415 | 0.405 |
|                |                 | $n_{ij}^{1st}$  | 0.98  | 0.10  | 5.49  | 7.54  | 5.09  |
|                |                 |                 | 1.97  | 0.22  | 5.34  | 7.62  | 6.57  |
|                |                 | 2.95            | 0.35  | 5.17  | 8.11  | 7.06  |       |
|                |                 | 3.90            | 0.50  | 4.97  | 8.61  | 8.11  |       |
|                |                 | 6.05            | 0.96  | 4.33  | 9.66  | 8.72  |       |
|                |                 | 7.95            | 1.45  | 3.67  | 10.31 | 8.03  |       |
|                | NaI             | $R_{max}^{1st}$ |       | 0.29  | 0.23  | 0.35  | 0.28  |
|                |                 | $R_{min}^{1st}$ |       | 0.375 | 0.315 | 0.425 | 0.395 |
| $n_{ij}^{1st}$ |                 | 0.97            | 0.07  | 5.48  | 7.91  | 5.04  |       |
|                |                 | 1.92            | 0.16  | 5.40  | 7.98  | 6.42  |       |
|                |                 | 2.83            | 0.26  | 5.24  | 8.04  | 6.83  |       |
|                |                 | 3.70            | 0.39  | 5.05  | 8.59  | 7.18  |       |
|                |                 | 5.59            | 0.84  | 4.37  | 9.60  | 7.56  |       |
|                |                 | 7.18            | 1.31  | 3.66  | 10.80 | 6.79  |       |
| LiCl           |                 | $R_{max}^{1st}$ |       | 0.23  | 0.19  | 0.32  | 0.28  |
|                |                 | $R_{min}^{1st}$ |       | 0.315 | 0.265 | 0.398 | 0.360 |
|                | $n_{ij}^{1st}$  | 1               | 0.04  | 3.96  | 7.67  | 5.51  |       |
|                |                 | 3               | 0.12  | 3.88  | 7.80  | 5.40  |       |
|                |                 | 5               | 0.22  | 3.78  | 7.91  | 5.25  |       |
|                | $R_{max}^{2nd}$ |                 | 0.46  | 0.41  | 0.50  | 0.45  |       |
|                | $R_{min}^{2nd}$ |                 | 0.546 | 0.502 | 0.626 | 0.566 |       |
|                | $n_{ij}^{2nd}$  | 1               | 0.61  | 14.16 | 25.07 | 18.59 |       |
|                |                 | 3               | 1.48  | 13.29 | 24.32 | 17.29 |       |
|                |                 | 5               | 2.26  | 12.46 | 23.36 | 16.27 |       |
| KCl            | $R_{max}^{1st}$ |                 | 0.31  | 0.26  | 0.32  | 0.28  |       |
|                | $R_{min}^{1st}$ |                 | 0.389 | 0.342 | 0.384 | 0.334 |       |
|                | $n_{ij}^{1st}$  | 1               | 0.20  | 6.11  | 7.03  | 4.32  |       |
|                |                 | 3               | 0.54  | 5.77  | 6.79  | 4.03  |       |
|                |                 | 5               | 0.89  | 5.39  | 6.48  | 3.74  |       |

|      |                 |      |       |       |       |       |
|------|-----------------|------|-------|-------|-------|-------|
| RbCl | $R_{max}^{1st}$ |      | 0.32  | 0.28  | 0.32  | 0.27  |
|      | $R_{min}^{1st}$ |      | 0.404 | 0.361 | 0.385 | 0.332 |
|      | $n_{ij}^{1st}$  | 1    | 0.24  | 6.75  | 7.03  | 4.23  |
|      |                 | 3    | 0.60  | 6.35  | 6.72  | 3.89  |
| 5    |                 | 0.95 | 5.95  | 6.32  | 3.57  |       |
| CsCl | $R_{max}^{1st}$ |      | 0.34  | 0.29  | 0.32  | 0.27  |
|      | $R_{min}^{1st}$ |      | 0.428 | 0.376 | 0.385 | 0.334 |
|      | $n_{ij}^{1st}$  | 1    | 0.34  | 7.15  | 6.91  | 4.28  |
|      |                 | 3    | 0.78  | 6.63  | 6.48  | 3.92  |
| 5    |                 | 1.18 | 6.15  | 6.06  | 3.59  |       |
| KI   | $R_{max}^{1st}$ |      | 0.33  | 0.26  | 0.34  | 0.27  |
|      | $R_{min}^{1st}$ |      | 0.418 | 0.342 | 0.412 | 0.332 |
|      | $n_{ij}^{1st}$  | 1    | 0.24  | 6.02  | 7.34  | 4.20  |
|      |                 | 3    | 0.68  | 5.47  | 7.00  | 3.83  |
| 5    |                 | 1.10 | 4.96  | 6.61  | 3.51  |       |
| CsBr | $R_{max}^{1st}$ |      | 0.34  | 0.29  | 0.33  | 0.27  |
|      | $R_{min}^{1st}$ |      | 0.438 | 0.380 | 0.394 | 0.332 |
|      | $n_{ij}^{1st}$  | 1    | 0.39  | 7.18  | 6.90  | 4.19  |
|      |                 | 3    | 0.93  | 6.47  | 6.34  | 3.81  |
| 5    |                 | 1.38 | 5.88  | 5.85  | 3.49  |       |

Table S3. Fitting constants for Equation 4 determined by fitting experimental alkali halide activity coefficients and the corresponding simulated activity derivatives.

|      |      | $a_1$  | $a_2$   | $a_3$   | $a_4$  | $m_s^{\max}$ |
|------|------|--------|---------|---------|--------|--------------|
| NaF  | Exp  | 1.2759 | -0.0410 | 0       | 0      | 1.0          |
|      | KBFF | 1.2759 | 0.1757  | 0       | 0      | 1.0          |
| NaCl | Exp  | 1.3360 | 0.0810  | 0       | 0      | 6.0          |
|      | KBFF | 1.3360 | 0.0827  | 0       | 0      | 5.0          |
| NaBr | Exp  | 1.4360 | 0.1041  | 0       | 0      | 4.0          |
|      | KBFF | 1.4360 | 0       | 0.3342  | 0.0263 | 5.0          |
| NaI  | Exp  | 1.6350 | 0.1300  | 0       | 0      | 3.5          |
|      | KBFF | 1.6350 | 0       | 0.4308  | 0.0133 | 5.0          |
| LiCl | Exp  | 1.4644 | 0       | 0.2110  | 0.0102 | 6.0          |
|      | KBFF | 1.4644 | 0       | -0.2430 | 0.0086 | 5.0          |
| KCl  | Exp  | 1.1720 | 0.0360  | 0       | 0      | 5.0          |
|      | KBFF | 1.1720 | 0.0260  | 0       | 0      | 5.0          |
| RbCl | Exp  | 1.0643 | 0.0311  | 0       | 0      | 5.0          |
|      | KBFF | 1.0643 | 0.0482  | 0       | 0      | 5.0          |
| CsCl | Exp  | 0.8402 | 0.0311  | 0       | 0      | 6.0          |
|      | KBFF | 0.8402 | 0.0398  | 0       | 0      | 5.0          |
| KI   | Exp  | 1.4259 | 0.0480  | 0       | 0      | 4.5          |
|      | KBFF |        |         |         |        | N/A          |
| CsBr | Exp  | 0.8453 | 0.0216  | 0       | 0      | 5.0          |
|      | KBFF |        |         |         |        | N/A          |

Experimental data was fitted to Equation 4

$$\ln \gamma_{\pm} = \frac{-1.178\sqrt{m_s}}{1 + a_1\sqrt{m_s}} - \ln(1 - a_2 m_s) + a_3 m_s + a_4 m_s^2$$

Simulated data was fitted using the following activity coefficient derivative,

$$\left( \frac{\partial \ln \gamma_{\pm}}{\partial \ln m_s} \right)_{T,P} = \frac{-N_{22}^+}{1 + N_{22}^+} \quad N_{22}^+ = N_{22} + m_2(1 + N_{11} - 2N_{21})$$

which can be then be expressed in terms of the derivative of Equation 4. The fits should be considered approximate due to the relatively low number of points used (typically three). The simulated data for KI and CsBr could not be fitted accurately using the above relationships.

Table S4. Lattice energies (kJ/mol) for alkali halide crystals.

|      | Exp   | Hagler FF | KBFF   |
|------|-------|-----------|--------|
| NaF  | 895.4 | 937.2     | 1217.7 |
| NaCl | 765.7 | 786.6     | 808.2  |
| NaBr | 728.0 | 744.8     | 776.1  |
| NaI  | 682.0 | 698.7     | 751.0  |
| LiCl | 832.6 | 861.9     | 1178.0 |
| KCl  | 694.5 | 711.3     | 725.3  |
| RbCl | 665.3 | 686.2     | 692.7  |
| CsCl | 648.5 | 644.3     | 650.1  |
| KI   | 627.6 | 636.0     | 663.2  |
| CsBr | 627.6 | 615.0     | 628.8  |

Exp: Experimental data taken from (Tosi, M. P.; Fumi, F. G. *J Phys Chem Solids* 1964, 25, 45)

Hagler FF: Hagler force field data taken from (Peng, Z. W.; Ewig, C. S.; Hwang, M. J.; Waldman, M.;

Hagler, A. T. *J Phys Chem A* 1997, 101, 7243)

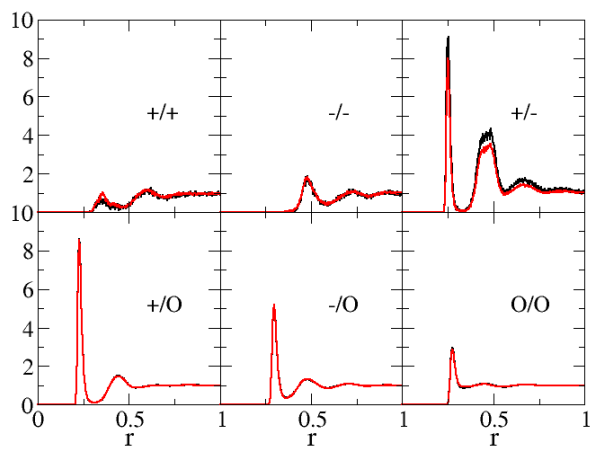

Figure S1. Radial distribution functions of NaF obtained from the 0.5 m (black lines) and 1 m (red lines) simulations. Cations, anions, and the water oxygen are denoted by the symbols +, -, and o, respectively.

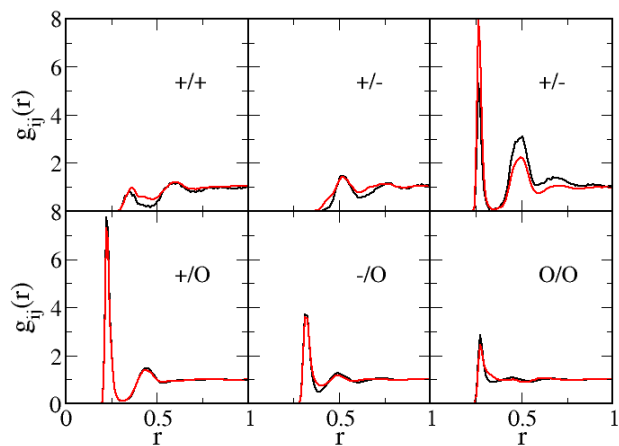

Figure S2. Radial distribution functions of NaCl obtained from the 0.99 m (black lines) and 4.01 m (red lines) simulations. Cations, anions, and the water oxygen are denoted by the symbols +, -, and o, respectively.

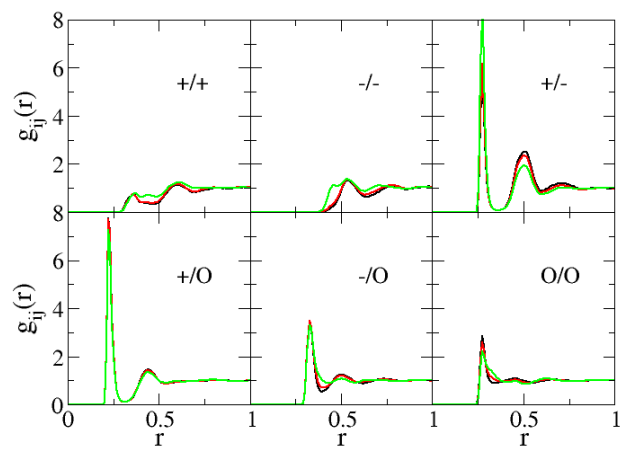

Figure S3. Radial distribution functions of NaBr obtained from the 0.98 m (black lines), 2.95 m (red lines), and 6.05 m (green lines) simulations. Cations, anions, and the water oxygen are denoted by the symbols +, -, and o, respectively.

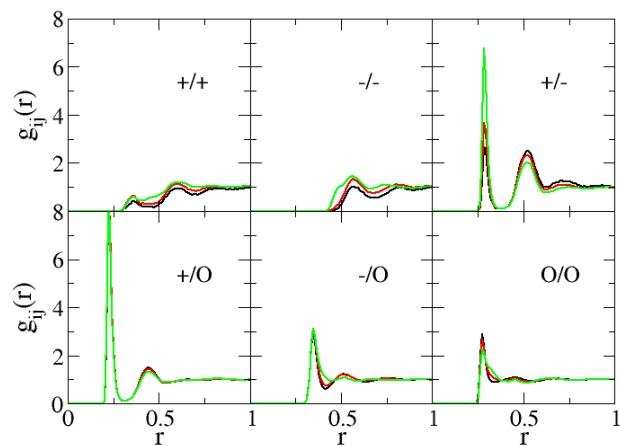

Figure S4. Radial distribution functions of NaI obtained from the 0.97 m (black lines), 2.83 m (red lines), and 5.59 m (green lines) simulations. Cations, anions, and the water oxygen are denoted by the symbols +, -, and o, respectively.

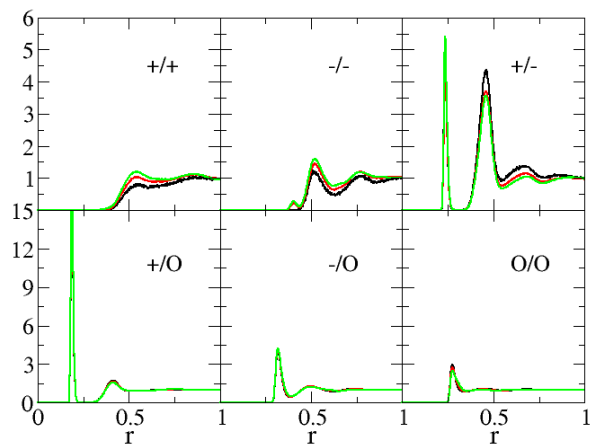

Figure S5. Radial distribution functions of LiCl obtained from the 1 m (black lines), 3 m (red lines), and 5 m (green lines) simulations. Cations, anions, and the water oxygen are denoted by the symbols +, -, and o, respectively.

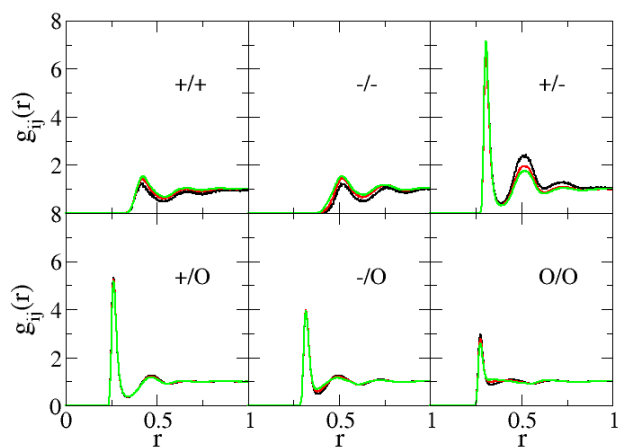

Figure S6. Radial distribution functions of KCl obtained from the 1 m (black lines), 3 m (red lines), and 5 m (green lines) simulations. Cations, anions, and the water oxygen are denoted by the symbols +, -, and o, respectively.



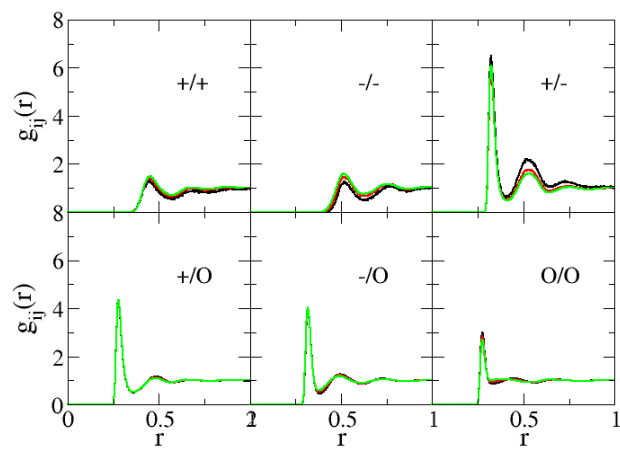

Figure S7. Radial distribution functions of RbCl obtained from the 1 m (black lines), 3 m (red lines), and 5 m (green lines) simulations. Cations, anions, and the water oxygen are denoted by the symbols +, -, and o, respectively.

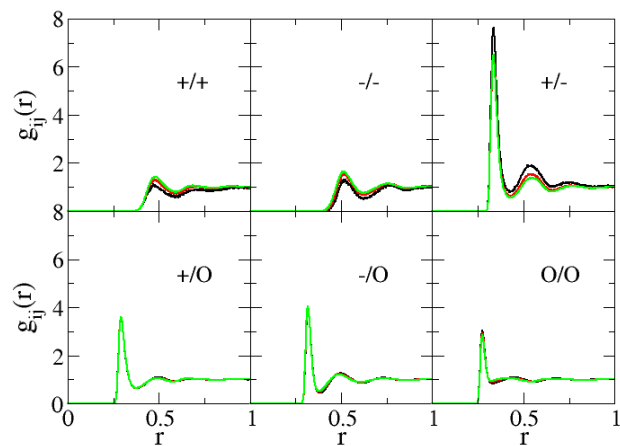

Figure S8. Radial distribution functions of CsCl obtained from the 1 m (black lines), 3 m (red lines), and 5 m (green lines) simulations. Cations, anions, and the water oxygen are denoted by the symbols +, -, and o, respectively.

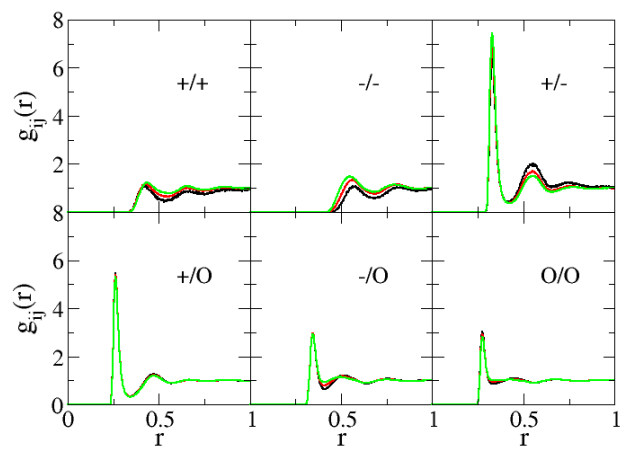

Figure S9. Radial distribution functions of KI obtained from the 1 m (black lines), 3 m (red lines), and 5 m (green lines) simulations. Cations, anions, and the water oxygen are denoted by the symbols +, -, and o, respectively.

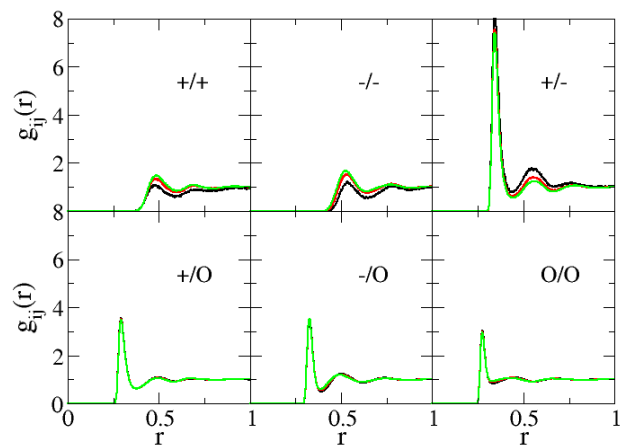

Figure S10. Radial distribution functions of CsBr obtained from the 1 m (black lines), 3 m (red lines), and 5 m (green lines) simulations. Cations, anions, and the water oxygen are denoted by the symbols +, -, and o, respectively.
